# Supplementary material for: The effect of the synthetic route on the structural, textural, morphological and catalytic properties of iron(iii) oxides and oxyhydroxides
Source: Royal Society of Chemistry journal article supplement (doi:10.1039/c6dt00247a), 2016-01-01
Supplement: c6dt00247a1.pdf [file c6dt00247a1.pdf]

**Supplementary Information to**  
**‘Effect of the synthetic route on the structural,**  
**textural, morphological and catalytic properties of**  
**Iron(III) oxides and oxyhydroxides’**

*Paula Oulego<sup>a</sup>, María A. Villa-García<sup>b\*</sup>, Adriana Laca<sup>a</sup> and Mario Diaz<sup>a</sup>*

<sup>a</sup>Department of Chemical and Environmental Engineering, University of Oviedo.

<sup>b</sup>Department of Organic and Inorganic Chemistry, University of Oviedo.

c/Julián Clavería, s/n, 33071, Oviedo, Spain

(29 Pages, 5 Tables, 2 Figures)

**Table of contents**

- 1. Instrumental parameters for the determination of the iron content by ICP-MS (Table S1).**
- 2. Determination of bacterial toxicity of the landfill leachate treated by catalytic wet oxidation.**
- 3. Determination of the color number (CN) of the landfill leachate treated by catalytic wet oxidation.**
- 4. Selected electron diffraction pattern (SAED) of hematite H1 (Figure S1).**
- 5. EDX analysis of the iron(III) oxides and oxyhydroxides (Figure S2).**
- 6. Comparison of the data of this study with those found in the literature (Table S2 to S5).**
- 7. References**

\*Corresponding author's e-mail: mavg@uniovi.es (M.A. Villa-García)

Phone: +34 985 10 29 76; Fax: +34 985 10 34 46

**1. Instrumental parameters for the determination of the iron content by ICP-MS (Table S1).**

**Table S1.** Instrumental parameters for ICP-MS.

| Inductively Coupled Plasma    |                | Mass Spectrometer |                                        |
|-------------------------------|----------------|-------------------|----------------------------------------|
| RF power (W)                  | 1500           | Sampling cone     | Nickel                                 |
| Carrier gas (L/min)           | 1.12           | Skimmer cone      | Nickel                                 |
| Plasma gas (L/min)            | 15             | Data acquisition  | 3 points per mass                      |
| Auxiliary gas (L/min)         | 1.0            | Integration time  | 0.1 s per point                        |
| Sample depth (mm)             | 8              | Acquisitions      | 5                                      |
| Solution uptake rate (mL/min) | 0.4            | Analytical masses | <sup>57</sup> Fe and <sup>103</sup> Rh |
| Nebulizer                     | Babington type |                   |                                        |

## **2. Determination of bacterial toxicity of the landfill leachate treated by catalytic wet oxidation**

The assessment of bacterial toxicity was carried out with *Vibrio fischeri*. The commercial assay Biofix®Lumi-10 (Macherey-Nagel, Germany) was employed using a freeze-dried specially selected strain of the marine bacterium (NRRL number B-11177). Toxicity was evaluated in samples diluted 1:5 and results were given as inhibition percentage (LI) according to ISO 11348-3. The drop in light emission of the bacteria after a contact period of 15 min was measured and compared with a sample of control free of toxicants (2% NaCl solution). Temperature was kept at 15 °C by a thermo block and sample salinity was adjusted to 2% after adjusting the sample pH between 6.5 and 7.5.

### 3. Determination of the color number (CN) of the landfill leachate treated by catalytic wet oxidation

As it was previously commented in the manuscript, the color number (CN), was employed to monitor changes in the color of the leachate during its oxidation, its value was calculated using equation S1. Spectral absorbance coefficients (SAC) are defined as the ratio of the values of the respective absorbance (Abs) over the cell thickness (x) (see equation S2). This parameter was measured at 436, 525 and 620 nm using a UV/Vis spectrophotometer (Thermo Scientific, Helios  $\gamma$ ).

$$CN = \frac{SAC_{436}^2 + SAC_{525}^2 + SAC_{620}^2}{SAC_{436} + SAC_{525} + SAC_{620}} \quad (S1)$$

$$SAC_i = \frac{Abs_i}{x} \quad (S2)$$

4. Selected electron diffraction pattern (SAED) of hematite H1 (Figure S1).

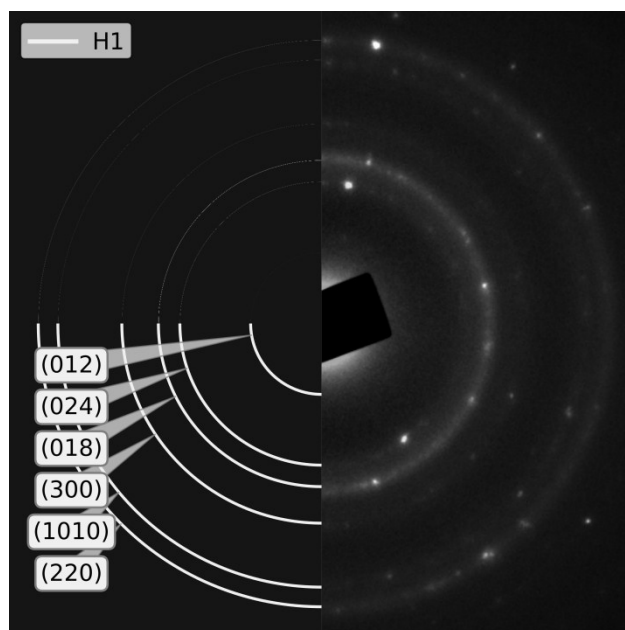

**Figure S1.** Electron diffraction pattern of hematite H1 (right) and simulated electron diffraction pattern of the rhomboedral hematite JCPDS no. 33-0664 (left).

5. EDX analysis of the iron(III) oxides and oxyhydroxides (Figure S2).

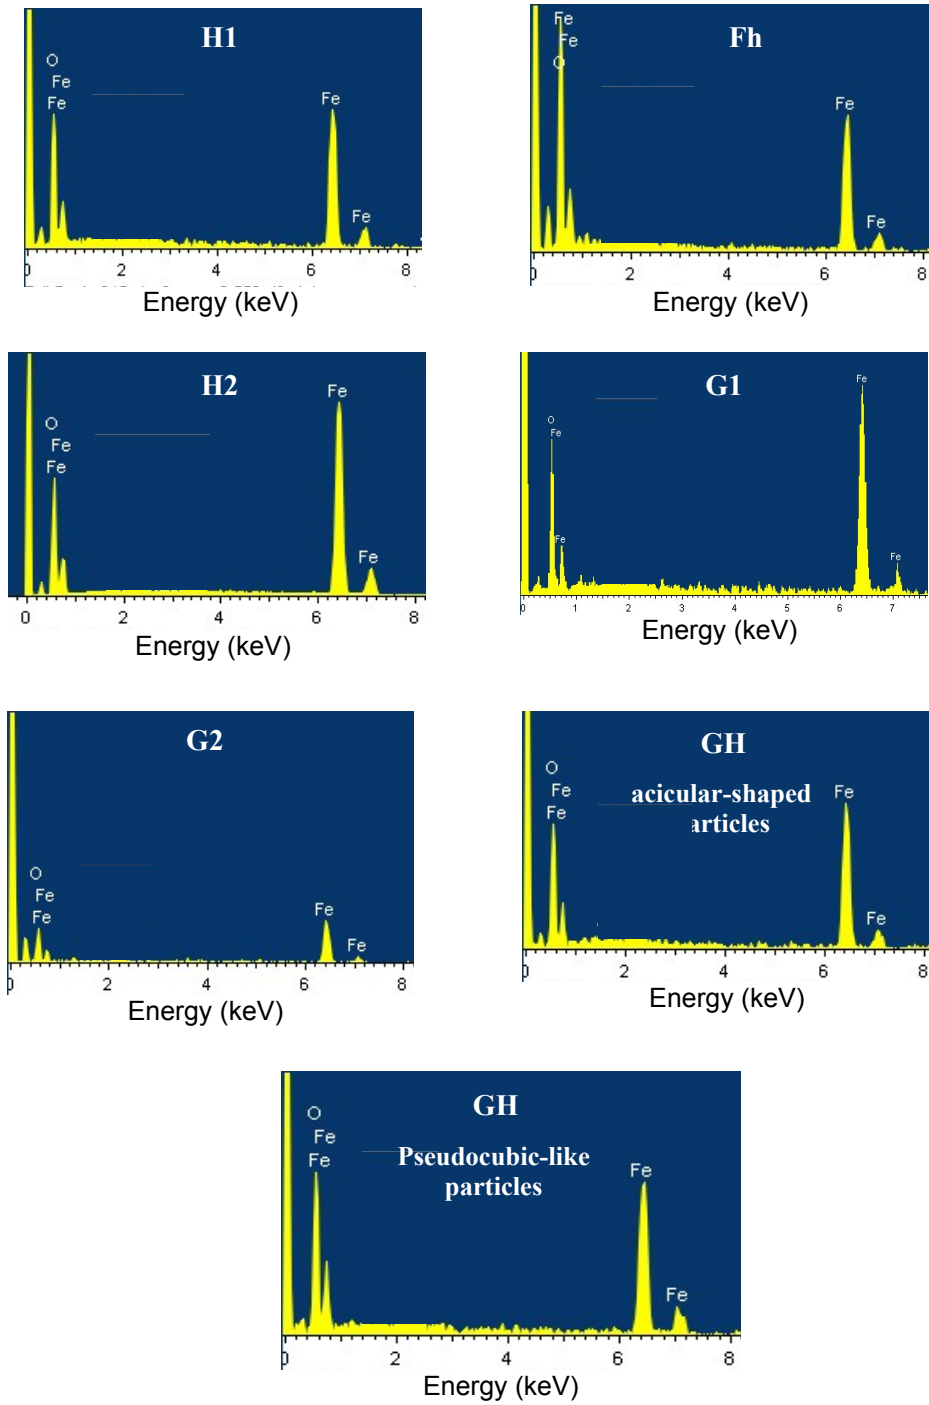

Figure S2. EDX analysis of the iron(III) oxides and oxyhydroxides.

## 6. Comparison of the data of this study with those found in the literature (Table S2 to S5).

Table S2. Comparison of X-ray diffraction data obtained in this study with those found in the literature.

| Sample   | Results of this study                                                    |                                                                        |                                                 |                                           | Data found in the literature                                                                                                                                                                                                                                                                                                                                          |                                                 |                                                                                                                                                                                                                             |                                                                                                                                                 |
|----------|--------------------------------------------------------------------------|------------------------------------------------------------------------|-------------------------------------------------|-------------------------------------------|-----------------------------------------------------------------------------------------------------------------------------------------------------------------------------------------------------------------------------------------------------------------------------------------------------------------------------------------------------------------------|-------------------------------------------------|-----------------------------------------------------------------------------------------------------------------------------------------------------------------------------------------------------------------------------|-------------------------------------------------------------------------------------------------------------------------------------------------|
|          | XRD peaks of the solids                                                  | Miller indices (hkl)                                                   | Iron-bearing phase                              | Crystallinity of the solids of this study | Miller indices (hkl)                                                                                                                                                                                                                                                                                                                                                  | Iron-bearing phase                              | Crystallinity of the solids of this study                                                                                                                                                                                   | Reference                                                                                                                                       |
| Hematite | Solid H1:<br>24.1°, 35.7°,<br>49.5°, 57.8°,<br>62.6°, 72.1°<br>and 75.4° | Solid H1:<br>(012), (110),<br>(024), (018),<br>(300), (1010),<br>(220) | Rhombohedral hematite:<br>JCPDS no.<br>33-0664. | Very poorly ordered material.             | <ul style="list-style-type: none"> <li>• Hematite nanospheres<sup>1</sup>:<br/>(012), (104), (110),<br/>(113), (024), (116),<br/>(018), (214), (300)</li> <li>• Hematite nanocubes<sup>2</sup> and thin film<sup>3</sup>:<br/>(012), (104), (110),<br/>(113), (024), (116),<br/>(018), (214), (300),<br/>(1010)</li> <li>• Hematite nanocubes<sup>4</sup>:</li> </ul> | Rhombohedral hematite:<br>JCPDS no.<br>33-0664. | <ul style="list-style-type: none"> <li>• Hematite nanospheres<sup>1</sup>: crystalline.</li> <li>• Hematite nanocubes<sup>2,4</sup>: highly crystalline.</li> <li>• Hematite thin film<sup>3</sup>: crystalline.</li> </ul> | <sup>1</sup> Tadic et al., 2012;<br><sup>2</sup> Qin et al., 2011;<br><sup>3</sup> Hamd et al., 2012;<br><sup>4</sup> Chernyshova et al., 2010. |

|  |  |  |  |  |                                                                                             |  |  |  |
|--|--|--|--|--|---------------------------------------------------------------------------------------------|--|--|--|
|  |  |  |  |  | (012), (104), (110),<br>(006), (113), (200),<br>(024), (116), (018),<br>(214), (300), (208) |  |  |  |
|--|--|--|--|--|---------------------------------------------------------------------------------------------|--|--|--|

Table S2. Comparison of X-ray diffraction data obtained in this study with those found in the literature (continuation).

| Sample   | Results of this study                                                                               |                                                                                                |                                              |                                                               | Data found in the literature                                                                                                                                                                                             |                                              |                                                                                                                                                                    |                                                                                                                                           |
|----------|-----------------------------------------------------------------------------------------------------|------------------------------------------------------------------------------------------------|----------------------------------------------|---------------------------------------------------------------|--------------------------------------------------------------------------------------------------------------------------------------------------------------------------------------------------------------------------|----------------------------------------------|--------------------------------------------------------------------------------------------------------------------------------------------------------------------|-------------------------------------------------------------------------------------------------------------------------------------------|
|          | XRD peaks of the solids                                                                             | Miller indices (hkl)                                                                           | Iron-bearing phase                           | Crystallinity of the solids of this study                     | Miller indices (hkl)                                                                                                                                                                                                     | Iron-bearing phase                           | Crystallinity of the solids of this study                                                                                                                          | Reference                                                                                                                                 |
| Hematite | Solid H2:<br>24.1°, 33.4°,<br>35.7°, 41.1°,<br>49.5°, 54.2°,<br>62.6°, 64.1°,<br>72.1° and<br>75.4° | Solid H2:<br>(012), (104),<br>(110), (113),<br>(024), (116),<br>(214), (300),<br>(1010), (220) | Rhombohedral hematite:<br>JCPDS no. 33-0664. | Poorly ordered material and/or presence of very fine hematite | <ul style="list-style-type: none"> <li>• Hematite nanospheres<sup>1</sup>: (012), (104), (110), (113), (024), (116), (018), (214), (300)</li> <li>• Hematite nanocubes<sup>2</sup> and thin film<sup>3</sup>:</li> </ul> | Rhombohedral hematite:<br>JCPDS no. 33-0664. | <ul style="list-style-type: none"> <li>• Hematite nanospheres<sup>1</sup>: crystalline.</li> <li>• Hematite nanocubes<sup>2,4</sup>: highly crystalline</li> </ul> | <sup>1</sup> Tadic et al., 2012;<br><sup>2</sup> Qin et al., 2011;<br><sup>3</sup> Hamd et al., 2012;<br><sup>4</sup> Chernyshova et al., |



|  |  |  |  |           |                                                                                                                                                                                                                             |  |                                                        |       |
|--|--|--|--|-----------|-----------------------------------------------------------------------------------------------------------------------------------------------------------------------------------------------------------------------------|--|--------------------------------------------------------|-------|
|  |  |  |  | particles | (012), (104), (110),<br>(113), (024), (116),<br>(018), (214), (300),<br>(1010)<br><br>• Hematite<br>nanocubes <sup>4</sup> :<br>(012), (104), (110),<br>(006), (113), (200),<br>(024), (116), (018),<br>(214), (300), (208) |  | • Hematite thin<br>film <sup>3</sup> :<br>crystalline. | 2010. |
|--|--|--|--|-----------|-----------------------------------------------------------------------------------------------------------------------------------------------------------------------------------------------------------------------------|--|--------------------------------------------------------|-------|

Table S2. Comparison of X-ray diffraction data obtained in this study with those found in the literature (continuation).

| <i>Sample</i> | <i>Results of this study</i>       |                                     |                               |                                                          | <i>Data found in the literature</i> |                               |                                                          |                  |
|---------------|------------------------------------|-------------------------------------|-------------------------------|----------------------------------------------------------|-------------------------------------|-------------------------------|----------------------------------------------------------|------------------|
|               | <i>XRD peaks<br/>of the solids</i> | <i>Miller<br/>indices<br/>(hkl)</i> | <i>Iron-bearing<br/>phase</i> | <i>Crystallinity<br/>of the solids<br/>of this study</i> | <i>Miller indices (hkl)</i>         | <i>Iron-bearing<br/>phase</i> | <i>Crystallinity<br/>of the solids<br/>of this study</i> | <i>Reference</i> |
|               |                                    |                                     |                               |                                                          |                                     |                               |                                                          |                  |

|              |                           |                        |                                                                                      |                          |                                                     |                                                                                                                                                                                                     |                                    |                                                                                                                                        |
|--------------|---------------------------|------------------------|--------------------------------------------------------------------------------------|--------------------------|-----------------------------------------------------|-----------------------------------------------------------------------------------------------------------------------------------------------------------------------------------------------------|------------------------------------|----------------------------------------------------------------------------------------------------------------------------------------|
| Ferrihydrite | Solid Fh: 35.7° and 63.5° | Solid Fh: (110), (300) | No single formula is widely accepted. $\text{Fe}_{10.4}\text{O}_{14.2}(\text{OH})_2$ | Poorly ordered material. | • 2-line ferrihydrite <sup>5,6</sup> : (110), (300) | $\text{Fe}_{10}\text{O}_{14}(\text{OH})_2$ <sup>5</sup><br>$\text{Fe}_5\text{HO}_8 \cdot 4\text{H}_2\text{O}$ <sup>6</sup> ;<br>$5\text{Fe}_2\text{O}_3 \cdot 9\text{H}_2\text{O}$ <sup>6,7</sup> ; | Poorly crystalline. <sup>5-7</sup> | <sup>5</sup> Michel <i>et al.</i> , 2007;<br><sup>6</sup> Tüysüz <i>et al.</i> , 2011;<br><sup>7</sup> Fleischer <i>et al.</i> , 1975. |
|--------------|---------------------------|------------------------|--------------------------------------------------------------------------------------|--------------------------|-----------------------------------------------------|-----------------------------------------------------------------------------------------------------------------------------------------------------------------------------------------------------|------------------------------------|----------------------------------------------------------------------------------------------------------------------------------------|

Table S2. Comparison of X-ray diffraction data obtained in this study with those found in the literature (continuation).

|               | <i>Results of this study</i>   |                             |                           |                                                  | <i>Data found in the literature</i> |                           |                                                  |                  |
|---------------|--------------------------------|-----------------------------|---------------------------|--------------------------------------------------|-------------------------------------|---------------------------|--------------------------------------------------|------------------|
| <i>Sample</i> | <i>XRD peaks of the solids</i> | <i>Miller indices (hkl)</i> | <i>Iron-bearing phase</i> | <i>Crystallinity of the solids of this study</i> | <i>Miller indices (hkl)</i>         | <i>Iron-bearing phase</i> | <i>Crystallinity of the solids of this study</i> | <i>Reference</i> |

|          |                                                                                                                                                                               |                                                                                                                                                                    |                                                                |                        |                                                                                                                                                                                                                                                                                                                                                                                     |                                                                 |                                                                                                                          |                                                                                                                                                          |
|----------|-------------------------------------------------------------------------------------------------------------------------------------------------------------------------------|--------------------------------------------------------------------------------------------------------------------------------------------------------------------|----------------------------------------------------------------|------------------------|-------------------------------------------------------------------------------------------------------------------------------------------------------------------------------------------------------------------------------------------------------------------------------------------------------------------------------------------------------------------------------------|-----------------------------------------------------------------|--------------------------------------------------------------------------------------------------------------------------|----------------------------------------------------------------------------------------------------------------------------------------------------------|
| Goethite | Solid G1:<br>17.9°, 21.2°,<br>26.1°, 33.2°,<br>33.5°, 36.7°,<br>40.3°, 41.4°,<br>45.5°, 47.6°,<br>50.9, 53.1°,<br>57.6°, 59.1°,<br>61.5°, 64.7°,<br>69.3°, 71.7°<br>and 75.4° | Solid G1:<br>(020), (110), (120),<br>(130), (021), (111),<br>(121), (140), (131),<br>(041), (211), (221),<br>(231), (151), (002),<br>(061), (112), (170),<br>(132) | Orthorhombic<br>phase of<br>goethite:<br>JCPDS no.<br>29-0713. | Highly<br>crystalline. | <ul style="list-style-type: none"> <li>Goethite rods<sup>8,9</sup>:<br/>(020), (110), (120),<br/>(130), (021), (040),<br/>(111), (200), (121),<br/>(140), (211), (221),<br/>(240), (231), (151),<br/>(160), (020), (161)</li> <li>Acicular<br/>goethite<sup>10</sup>:<br/>(020), (110), (120),<br/>(130), (021), (040),<br/>(111), (200), (121),<br/>(140), (211), (221)</li> </ul> | Orthorhombic<br>phase of<br>goethite:<br>JCPDS no. 29-<br>0713. | Goethite<br>rods: highly<br>crystalline. <sup>8,9</sup><br>Acicular<br>goethite:<br>highly<br>crystalline. <sup>10</sup> | <sup>8</sup> Ristić <i>et al.</i> ,<br>2015;<br><sup>9</sup> Wei <i>et al.</i> ,<br>2012;<br><sup>10</sup> Montes-<br>Hernandez <i>et al.</i> ,<br>2011. |
|----------|-------------------------------------------------------------------------------------------------------------------------------------------------------------------------------|--------------------------------------------------------------------------------------------------------------------------------------------------------------------|----------------------------------------------------------------|------------------------|-------------------------------------------------------------------------------------------------------------------------------------------------------------------------------------------------------------------------------------------------------------------------------------------------------------------------------------------------------------------------------------|-----------------------------------------------------------------|--------------------------------------------------------------------------------------------------------------------------|----------------------------------------------------------------------------------------------------------------------------------------------------------|

Table S2. Comparison of X-ray diffraction data obtained in this study with those found in the literature (continuation).

| Sample | Results of this study |                      |              |               | Data found in the literature |              |               |           |
|--------|-----------------------|----------------------|--------------|---------------|------------------------------|--------------|---------------|-----------|
|        | XRD peaks             | Miller indices (hkl) | Iron-bearing | Crystallinity | Miller indices (hkl)         | Iron-bearing | Crystallinity | Reference |
|        |                       |                      |              |               |                              |              |               |           |

|          | <i>of the solids</i>                                                                                                                                                   |                                                                                                                                                          | <i>phase</i>                                                   | <i>of the solids<br/>of this study</i> |                                                                                                                                                                                                                                                                                                                                                                                     | <i>phase</i>                                                   | <i>of the solids<br/>of this study</i>                                                                                   |                                                                                                                                                          |
|----------|------------------------------------------------------------------------------------------------------------------------------------------------------------------------|----------------------------------------------------------------------------------------------------------------------------------------------------------|----------------------------------------------------------------|----------------------------------------|-------------------------------------------------------------------------------------------------------------------------------------------------------------------------------------------------------------------------------------------------------------------------------------------------------------------------------------------------------------------------------------|----------------------------------------------------------------|--------------------------------------------------------------------------------------------------------------------------|----------------------------------------------------------------------------------------------------------------------------------------------------------|
| Goethite | Solid G2:<br>17.9°, 21.2°,<br>26.1°, 33.2°,<br>33.5°, 36.7°,<br>40.3°, 41.4°,<br>47.6°, 50.9,<br>53.1°, 57.6°,<br>59.1°, 61.5°,<br>64.7°, 69.3°,<br>71.7° and<br>75.4° | Solid G2:<br>(020), (110), (120),<br>(130), (021), (111),<br>(121), (140), (041),<br>(211), (221), (231),<br>(151), (002), (061),<br>(112), (170), (132) | Orthorhombic<br>phase of<br>goethite:<br>JCPDS no.<br>29-0713. | Highly<br>crystalline                  | <ul style="list-style-type: none"> <li>Goethite rods<sup>8,9</sup>:<br/>(020), (110), (120),<br/>(130), (021), (040),<br/>(111), (200), (121),<br/>(140), (211), (221),<br/>(240), (231), (151),<br/>(160), (020), (161)</li> <li>Acicular<br/>goethite<sup>10</sup>:<br/>(020), (110), (120),<br/>(130), (021), (040),<br/>(111), (200), (121),<br/>(140), (211), (221)</li> </ul> | Orthorhombic<br>phase of<br>goethite:<br>JCPDS no.<br>29-0713. | Goethite<br>rods: highly<br>crystalline. <sup>8,9</sup><br>Acicular<br>goethite:<br>highly<br>crystalline. <sup>10</sup> | <sup>8</sup> Ristić <i>et al.</i> ,<br>2015;<br><sup>9</sup> Wei <i>et al.</i> ,<br>2012;<br><sup>10</sup> Montes-<br>Hernandez <i>et al.</i> ,<br>2011. |

Table S2. Comparison of X-ray diffraction data obtained in this study with those found in the literature (continuation).

| <i>Results of this study</i> | <i>Data found in the literature</i> |
|------------------------------|-------------------------------------|
|------------------------------|-------------------------------------|

| <i>Sample</i>                    | <i>XRD peaks of the solids</i>                                                                                                                | <i>Miller indices (hkl)</i>                                                                                                              | <i>Iron-bearing phase</i>                                                                           | <i>Crystallinity of the solids of this study</i> | <i>Miller indices (hkl)</i>                                                                                                                                                                                                                                            | <i>Iron-bearing phase</i>                                                                           | <i>Crystallinity of the solids of this study</i>                                                               | <i>Reference</i>                                                                                              |
|----------------------------------|-----------------------------------------------------------------------------------------------------------------------------------------------|------------------------------------------------------------------------------------------------------------------------------------------|-----------------------------------------------------------------------------------------------------|--------------------------------------------------|------------------------------------------------------------------------------------------------------------------------------------------------------------------------------------------------------------------------------------------------------------------------|-----------------------------------------------------------------------------------------------------|----------------------------------------------------------------------------------------------------------------|---------------------------------------------------------------------------------------------------------------|
| Mixture of hematite and goethite | Solid GH:<br>• Hematite: 24.1°, 33.4°, 35.7°, 41.1°, 49.5°, 54.2°, 62.6°, 64.1°, 72.1° and 75.4°<br>• Goethite: 36.7°, 53.3°, 57.6° and 59.2° | Solid GH:<br>• Hematite: (012), (104), (110), (113), (024), (116), (214), (300), (1010), (220)<br>• Goethite: (111), (221), (231), (151) | • Rhombohedral hematite: JCPDS no. 33-0664.<br>• Orthorhombic phase of goethite: JCPDS no. 29-0713. | Both phases highly crystalline                   | • Hematite nanocubes <sup>4</sup> (012), (104), (110), (113), (024), (116), (018), (214), (300), (1010)<br>• Goethite rods <sup>8,9</sup> (020), (110), (120), (130), (021), (040), (111), (200), (121), (140), (211), (221), (240), (231), (151), (160), (020), (161) | • Rhombohedral hematite: JCPDS no. 33-0664.<br>• Orthorhombic phase of goethite: JCPDS no. 29-0713. | • Hematite nanocubes <sup>4</sup> : highly crystalline.<br>• Goethite rods: highly crystalline. <sup>8,9</sup> | <sup>4</sup> Chernyshova et al., 2010.<br><sup>8</sup> Ristić et al., 2015;<br><sup>9</sup> Wei et al., 2012. |

Table S3. Comparison of Mössbauer data obtained in this study with those found in the literature.

| <i>Sample</i>        | <i>Results of this study</i> |                                                        |                                              | <i>Data found in the literature</i> |                                                                     |                                                                |                                                                                                                  |
|----------------------|------------------------------|--------------------------------------------------------|----------------------------------------------|-------------------------------------|---------------------------------------------------------------------|----------------------------------------------------------------|------------------------------------------------------------------------------------------------------------------|
|                      | <i>Doublet</i>               | <i>Isomer shift</i><br>( $\delta$ ) mm·s <sup>-1</sup> | <i>Quadrupole splitting</i> ( $\Delta E_Q$ ) | <i>Doublet</i>                      | <i>Isomer shift</i><br>( $\delta$ ) mm·s <sup>-1</sup>              | <i>Quadrupole splitting</i> ( $\Delta E_Q$ )                   | <i>Reference</i>                                                                                                 |
| Ferrihydrite<br>(Fh) | Single<br>Paramagnetic       | 0.35                                                   | 0.62                                         | Paramagnetic                        | 0.33 <sup>11</sup><br>0.35 <sup>12</sup>                            | 0.62 <sup>11</sup><br>0.63 <sup>12</sup>                       | <sup>11</sup> Ristić et al., 2007;<br><sup>12</sup> Murad, 1996.                                                 |
| Hematite<br>(H1)     | Paramagnetic                 | 0.35                                                   | 0.72                                         | Paramagnetic                        | 0.35 <sup>13</sup><br>0.33 <sup>14</sup><br>0.33-0.35 <sup>15</sup> | 0.68 <sup>13</sup><br>0.75 <sup>14</sup><br>0.80 <sup>15</sup> | <sup>13</sup> Pariona et al., 2016;<br><sup>14</sup> Mashlan et al., 2004;<br><sup>15</sup> Zboril et al., 2002. |

Table S4. Comparison of FT-IR data obtained in this study with those found in the literature.

| <i>Sample</i>        | <i>Results of this study</i>                      |                                                |                                             |                                                                  |                                                    | <i>Data found in the literature</i>               |                                                |                                             |                                                                  |                                                    |                                                                                                                   |
|----------------------|---------------------------------------------------|------------------------------------------------|---------------------------------------------|------------------------------------------------------------------|----------------------------------------------------|---------------------------------------------------|------------------------------------------------|---------------------------------------------|------------------------------------------------------------------|----------------------------------------------------|-------------------------------------------------------------------------------------------------------------------|
|                      | <i>OH stretching vibrations (cm<sup>-1</sup>)</i> | <i>OH bending vibrations (cm<sup>-1</sup>)</i> | <i>Lattice vibrations (cm<sup>-1</sup>)</i> | <i>Carbonate species stretching vibrations (cm<sup>-1</sup>)</i> | <i>Characteristic vibrations (cm<sup>-1</sup>)</i> | <i>OH stretching vibrations (cm<sup>-1</sup>)</i> | <i>OH bending vibrations (cm<sup>-1</sup>)</i> | <i>Lattice vibrations (cm<sup>-1</sup>)</i> | <i>Carbonate species stretching vibrations (cm<sup>-1</sup>)</i> | <i>Characteristic vibrations (cm<sup>-1</sup>)</i> | <i>Reference</i>                                                                                                  |
| Ferrihydrite (Fh)    | 3400                                              | 1636                                           | 668                                         | 1384, 1108                                                       | 580, 452                                           | 3420-3357 <sup>11</sup>                           | 1623-1620 <sup>11</sup>                        | 660 <sup>11</sup><br><700 <sup>16</sup>     | 1352 <sup>11</sup><br>1360 <sup>17</sup> ,<br>1070 <sup>17</sup> | 580, 441 <sup>11</sup>                             | <sup>11</sup> Ristić et al., 2007;<br><sup>16</sup> Krehula and Musić, 2008;<br><sup>17</sup> Su and Suarez, 1997 |
| Hematite (H1 and H2) | 3434                                              | 1636                                           | 668                                         | 1540<br>1384                                                     | 532, 445                                           | 3420-3357 <sup>11</sup>                           | 1623-1620 <sup>11</sup>                        | 660 <sup>11</sup>                           | 1490 <sup>17</sup> ,<br>1360 <sup>17</sup>                       | 526, 440 <sup>18</sup>                             | <sup>11</sup> Ristić et al., 2007;<br><sup>16</sup> Krehula and Musić, 2008<br><sup>17</sup> Su and Suarez, 1997; |

|  |  |  |  |  |  |  |  |  |  |  |  |                                 |
|--|--|--|--|--|--|--|--|--|--|--|--|---------------------------------|
|  |  |  |  |  |  |  |  |  |  |  |  | <sup>18</sup> Jubb et al., 2010 |
|--|--|--|--|--|--|--|--|--|--|--|--|---------------------------------|

Table S4. Comparison of FT-IR data obtained in this study with those found in the literature (continuation).

| Sample               | Results of this study                    |                                     |                                  |                                                       |                                                                              | Data found in the literature                          |                                     |                                         |                                                                  |                                                                                                                              | Reference                                                                                                                                                                                      |
|----------------------|------------------------------------------|-------------------------------------|----------------------------------|-------------------------------------------------------|------------------------------------------------------------------------------|-------------------------------------------------------|-------------------------------------|-----------------------------------------|------------------------------------------------------------------|------------------------------------------------------------------------------------------------------------------------------|------------------------------------------------------------------------------------------------------------------------------------------------------------------------------------------------|
|                      | OH stretching vibrations ( $cm^{-1}$ )   | OH bending vibrations ( $cm^{-1}$ ) | Lattice vibrations ( $cm^{-1}$ ) | Carbonate species stretching vibrations ( $cm^{-1}$ ) | Characteristic vibrations ( $cm^{-1}$ )                                      | OH stretching vibrations ( $cm^{-1}$ )                | OH bending vibrations ( $cm^{-1}$ ) | Lattice vibrations ( $cm^{-1}$ )        | Carbonate species stretching vibrations ( $cm^{-1}$ )            | Characteristic vibrations ( $cm^{-1}$ )                                                                                      |                                                                                                                                                                                                |
| Goethite (G1 and G2) | 3434 <sup>a</sup> ,<br>3136 <sup>b</sup> | 1636                                | 668                              | 1384,<br>1111                                         | 894 <sup>c</sup> , 796 <sup>d</sup> ,<br>636 <sup>e</sup> , 457 <sup>f</sup> | 3420-<br>3357 <sup>a,11</sup><br>3144 <sup>b,18</sup> | 1620-<br>1623 <sup>11</sup>         | 660 <sup>11</sup><br><700 <sup>16</sup> | 1352 <sup>11</sup><br>1360 <sup>17</sup> ,<br>1070 <sup>17</sup> | 895-<br>884 <sup>c,19,20</sup> ,<br>800-<br>798 <sup>d,19,20</sup><br>622-<br>617 <sup>e,20</sup><br>461-454 <sup>f,20</sup> | <sup>11</sup> Ristić et al., 2007;<br><sup>16</sup> Krehula and Musić, 2008;<br><sup>17</sup> Su and Suarez, 1997;<br><sup>18</sup> Jubb et al., 2010;<br><sup>19</sup> Gotić and Musić, 2007; |





Table S4. Comparison of FT-IR data obtained in this study with those found in the literature (continuation).

| Sample                                | Results of this study                  |                                     |                                  |                                                       |                                                                           | Data found in the literature           |                                     |                                         |                                                                  |                                                                                                              | Reference                                                                                                                                                                                                      |
|---------------------------------------|----------------------------------------|-------------------------------------|----------------------------------|-------------------------------------------------------|---------------------------------------------------------------------------|----------------------------------------|-------------------------------------|-----------------------------------------|------------------------------------------------------------------|--------------------------------------------------------------------------------------------------------------|----------------------------------------------------------------------------------------------------------------------------------------------------------------------------------------------------------------|
|                                       | OH stretching vibrations ( $cm^{-1}$ ) | OH bending vibrations ( $cm^{-1}$ ) | Lattice vibrations ( $cm^{-1}$ ) | Carbonate species stretching vibrations ( $cm^{-1}$ ) | Characteristic vibrations ( $cm^{-1}$ )                                   | OH stretching vibrations ( $cm^{-1}$ ) | OH bending vibrations ( $cm^{-1}$ ) | Lattice vibrations ( $cm^{-1}$ )        | Carbonate species stretching vibrations ( $cm^{-1}$ )            | Characteristic vibrations ( $cm^{-1}$ )                                                                      |                                                                                                                                                                                                                |
| Mixture of hematite and goethite (GH) | 3447                                   | 1636                                | 668                              | 1384, 1112                                            | 894 <sup>a</sup> , 796 <sup>b</sup> , 560 <sup>c</sup> , 480 <sup>c</sup> | 3420-3357 <sup>11</sup>                | 1620-1623 <sup>11</sup>             | 660 <sup>11</sup><br><700 <sup>16</sup> | 1352 <sup>11</sup><br>1360 <sup>17</sup> ,<br>1070 <sup>17</sup> | 895-884 <sup>a,19,20</sup> ,<br>800-798 <sup>b,19,20</sup> ,<br>580 <sup>c,11</sup> ,<br>441 <sup>c,11</sup> | <sup>11</sup> Ristić <i>et al.</i> , 2007;<br><sup>16</sup> Krehula and Musić, 2008;<br><sup>17</sup> Su and Suarez, 1997;<br><sup>19</sup> Gotić and Musić, 2007;<br><sup>20</sup> Ruan <i>et al.</i> , 2001. |

<sup>a</sup>Fe-O-H vibration in-plane; <sup>b</sup>Fe-O-H vibration out-of-plane; <sup>c</sup>Bands which are the fingerprint of hematite (morphological effects can vary the positions of these bands).

Table S5. Comparison of textural characterization and microstructure of the solids obtained in this study with those found in the literature.

| <i>Synthetic route<sup>a</sup></i> |                                                      |                           |           |                         |                 | <i>Data found in the literature</i>       |                               |                                       |                               |                   |                                 |
|------------------------------------|------------------------------------------------------|---------------------------|-----------|-------------------------|-----------------|-------------------------------------------|-------------------------------|---------------------------------------|-------------------------------|-------------------|---------------------------------|
| <i>Sample</i>                      | <i>Iron source<sup>b</sup>; Additive<sup>c</sup></i> | <i>Method<sup>d</sup></i> | <i>pH</i> | <i>T of ageing (°C)</i> | <i>Time (h)</i> | <i>BET surface area (m<sup>2</sup>/g)</i> | <i>Average pore size (nm)</i> | <i>Pore Volume (cm<sup>3</sup>/g)</i> | <i>Particle Size: TEM(nm)</i> | <i>Morphology</i> | <i>Reference</i>                |
| Hematite                           | Fe(III) salt;<br>No additive                         | Precipitation             | n.a.      | 20                      | 4               | n.a.                                      | n.a.                          | n.a.                                  | Average: 50-100               | Irregular         | <sup>21</sup> Paul et al., 2015 |
| Hematite                           | Fe(III) salt;<br>With additives                      | Precipitation             | n.a.      | 20                      | 4               | 244.8 - 276.2                             | 8.83-9.74                     | 0.596 - 0.609                         | Average:2-50                  | Quasi spherical   | <sup>21</sup> Paul et al., 2015 |

<sup>a</sup>Implying batch system. <sup>b</sup>Fe(III) salt: Fe(NO<sub>3</sub>)<sub>3</sub>·9H<sub>2</sub>O. <sup>c</sup>Additives: PEG 400 or PEG 4000. <sup>d</sup>Precipitating agent: (CH<sub>2</sub>)<sub>6</sub>N<sub>4</sub>  
n.a.: Not reported.

Table S5. Comparison of textural characterization and microstructure of the solids obtained in this study with those found in the literature (continuation).

| <i>Synthetic route<sup>a</sup></i> |                                          |                                                  |           |                         |                 | <i>Data found in the literature</i>       |                               |                                       |                                                                    |                                        |                                           |
|------------------------------------|------------------------------------------|--------------------------------------------------|-----------|-------------------------|-----------------|-------------------------------------------|-------------------------------|---------------------------------------|--------------------------------------------------------------------|----------------------------------------|-------------------------------------------|
| <i>Sample</i>                      | <i>Iron source<sup>b</sup>; Additive</i> | <i>Method<sup>c</sup></i>                        | <i>pH</i> | <i>T of ageing (°C)</i> | <i>Time (h)</i> | <i>BET surface area (m<sup>2</sup>/g)</i> | <i>Average pore size (nm)</i> | <i>Pore Volume (cm<sup>3</sup>/g)</i> | <i>Particle Size: TEM<sup>d</sup> or Scherrer<sup>e</sup> (nm)</i> | <i>Morphology</i>                      | <i>Reference</i>                          |
| Hematite                           | Fe(III) salt;<br>No additive             | Precipitation                                    | n.a.      | 20                      | 4               | n.a.                                      | n.a.                          | n.a.                                  | Average <sup>e</sup> : 31                                          | Spheroidal                             | <sup>22</sup> Sivakumar et al., 2014      |
| Hematite                           | Fe(III) salt;<br>No additive             | Precipitation<br>(under pure N <sub>2</sub> gas) | 7         | >100                    | 1               | 18.5-55.4                                 | n.a.                          | n.a.                                  | Average <sup>d</sup> :<br>50-150                                   | Spherical,<br>cubic and<br>ellipsoidal | <sup>23</sup> Supattarasakda et al., 2013 |

<sup>a</sup>Implying batch system. <sup>b</sup>Fe(III) salt:  $\text{FeCl}_3 \cdot 6\text{H}_2\text{O}$ . <sup>c</sup>Precipitating agent: NaOH  
n.a.: Not reported.

Table S5. Comparison of textural characterization and microstructure of the solids obtained in this study with those found in the literature (continuation).

| <i>Synthetic route<sup>a</sup></i> |                                          |                           |           |                         |                 | <i>Data found in the literature</i>       |                               |                                       |                                |                   |                                |
|------------------------------------|------------------------------------------|---------------------------|-----------|-------------------------|-----------------|-------------------------------------------|-------------------------------|---------------------------------------|--------------------------------|-------------------|--------------------------------|
| <i>Sample</i>                      | <i>Iron source<sup>b</sup>; Additive</i> | <i>Method<sup>c</sup></i> | <i>pH</i> | <i>T of ageing (°C)</i> | <i>Time (h)</i> | <i>BET surface area (m<sup>2</sup>/g)</i> | <i>Average pore size (nm)</i> | <i>Pore Volume (cm<sup>3</sup>/g)</i> | <i>Particle Size: TEM (nm)</i> | <i>Morphology</i> | <i>Reference</i>               |
| Hematite                           | Fe(III) salt;<br>No additive             | Precipitation             | 7         | >100                    | n.a.            | 17.18-31.83                               | n.a.                          | n.a.                                  | Average: 60-80                 | Quasi-spherical   | <sup>24</sup> Liu et al., 2007 |
| Hematite                           | Fe(III) salt;<br>No additive             | Precipitation             | H1: 9     | H1: 20                  | H1:3            | H1: 291.4                                 | H1: 3.32-3.97                 | H1:0.328                              | H1(average): 4                 | H1: Spheroidal    | This study                     |
|                                    |                                          |                           | H2: 12    | H2: 20                  | H2:3            | H2: 118.3                                 | H2: 5.77-6.20                 | H2:0.188                              | H2: widely variable            | H2: amorphous     |                                |

<sup>a</sup>Implying batch system. <sup>b</sup>Fe(III) salt: FeCl<sub>3</sub>·6H<sub>2</sub>O or Fe(NO<sub>3</sub>)<sub>3</sub>·9H<sub>2</sub>O. <sup>c</sup>Precipitating agent: NaOH or NH<sub>4</sub>OH  
n.a.: Not reported.

Table S5. Comparison of textural characterization and microstructure of the solids obtained in this study with those found in the literature (continuation).

| <i>Sample</i> | <i>Synthetic route<sup>a</sup></i>                                                           |                    |           |                                 |                     | <i>Data found in the literature</i>           |                                       |                                           |                                    |                   |                                   |
|---------------|----------------------------------------------------------------------------------------------|--------------------|-----------|---------------------------------|---------------------|-----------------------------------------------|---------------------------------------|-------------------------------------------|------------------------------------|-------------------|-----------------------------------|
|               | <i>Iron source<sup>b</sup>;<br/>Additive</i>                                                 | <i>Method</i>      | <i>pH</i> | <i>T of<br/>ageing<br/>(°C)</i> | <i>Time<br/>(h)</i> | <i>BET surface<br/>area (m<sup>2</sup>/g)</i> | <i>Average<br/>pore size<br/>(nm)</i> | <i>Pore Volume<br/>(cm<sup>3</sup>/g)</i> | <i>Particle Size:<br/>TEM (nm)</i> | <i>Morphology</i> | <i>Reference</i>                  |
| Ferrihydrite  | Fe(III) salt;<br>cyclohexane,<br>polyethylene-glycol,<br>ammonia solution<br>and isopropanol | Micro-<br>emulsion | n.a.      | 50                              | 3                   | 390                                           | 5.6                                   | 0.54                                      | n.a.                               | n.a.              | <sup>25</sup> Xu et al.,<br>2013  |
| Ferrihydrite  | Fe(III) salt;<br>cyclohexane,<br>polyethylene-glycol,<br>ammonia solution<br>and isopropanol | Micro-<br>emulsion | n.a.      | 50                              | 3                   | 97                                            | 9.3                                   | 0.25                                      | Average : 10                       | spherical         | <sup>26</sup> Yan et al.,<br>2015 |

<sup>a</sup>Implying batch system. <sup>b</sup>Fe(III) salt: FeCl<sub>3</sub>.  
n.a.: Not reported.

Table S5. Comparison of textural characterization and microstructure of the solids obtained in this study with those found in the literature (continuation).

| <i>Synthetic route<sup>a</sup></i> |                                                               |                |           |                         |                 | <i>Data found in the literature</i>       |                               |                                       |                                |                   |                       |
|------------------------------------|---------------------------------------------------------------|----------------|-----------|-------------------------|-----------------|-------------------------------------------|-------------------------------|---------------------------------------|--------------------------------|-------------------|-----------------------|
| <i>Sample</i>                      | <i>Iron source<sup>b</sup>; Additive</i>                      | <i>Method</i>  | <i>pH</i> | <i>T of ageing (°C)</i> | <i>Time (h)</i> | <i>BET surface area (m<sup>2</sup>/g)</i> | <i>Average pore size (nm)</i> | <i>Pore Volume (cm<sup>3</sup>/g)</i> | <i>Particle Size: TEM (nm)</i> | <i>Morphology</i> | <i>Reference</i>      |
| Ferrihydrite                       | Fe(III) salt; brij 58, isopropyl alcohol and ammonia solution | Micro-emulsion | 8         | 55                      | 72              | 192.3                                     | 5.00-5.54                     | 0.341                                 | Average: 7                     | Spheroidal        | This study (solid Fh) |

<sup>a</sup>Implying batch system. <sup>b</sup>Fe(III) salt: Fe(NO<sub>3</sub>)<sub>3</sub>·9H<sub>2</sub>O.



Table S5. Comparison of textural characterization and microstructure of the solids obtained in this study with those found in the literature (continuation).

| <i>Synthetic route<sup>a</sup></i> |                                                          |                           |              |                                 |                     | <i>Data found in the literature</i>           |                                       |                                               |                                                                         |                   |                                                    |
|------------------------------------|----------------------------------------------------------|---------------------------|--------------|---------------------------------|---------------------|-----------------------------------------------|---------------------------------------|-----------------------------------------------|-------------------------------------------------------------------------|-------------------|----------------------------------------------------|
| <i>Sample</i>                      | <i>Iron source<sup>b</sup>;<br/>Additive<sup>c</sup></i> | <i>Method<sup>d</sup></i> | <i>pH</i>    | <i>T of<br/>ageing<br/>(°C)</i> | <i>Time<br/>(h)</i> | <i>BET surface<br/>area (m<sup>2</sup>/g)</i> | <i>Average<br/>pore size<br/>(nm)</i> | <i>Pore<br/>Volume<br/>(cm<sup>3</sup>/g)</i> | <i>Particle Size:<br/>FESEM<sup>e</sup> or TEM<sup>f</sup><br/>(nm)</i> | <i>Morphology</i> | <i>Reference</i>                                   |
| Goethite                           | Fe(III) salt;<br>No additive                             | Sol-gel                   | 2.5-<br>13.5 | 30                              | 24                  | 133.80                                        | n.a.                                  | n.a.                                          | Length <sup>e</sup> : 250±35<br>Width <sup>e</sup> : 65±20              | low acicular      | <sup>10</sup> Montes-<br>Hernández et<br>al., 2011 |
| Goethite                           | Fe(III) salt;<br>With additive                           | Sol-gel                   | 3.0          | 90                              | 1                   | n.a.                                          | n.a.                                  | n.a.                                          | Largest dimension<br>f: 1-10                                            | Irregular         | <sup>27</sup> Mohapatra<br>et al., 2009            |

<sup>a</sup>Implying batch system. <sup>b</sup>Fe(III) salt: Fe(NO<sub>3</sub>)<sub>3</sub>·9H<sub>2</sub>O or FeCl<sub>3</sub>·6H<sub>2</sub>O <sup>c</sup>Additive: hydrazine sulphate. <sup>d</sup>Alkaline source: NaOH or Ca(OH)<sub>2</sub>.

n.a.: Not reported.

Table S5. Comparison of textural characterization and microstructure of the solids obtained in this study with those found in the literature (continuation).

| <i>Synthetic route<sup>a</sup></i> |                                                          |                      |           |                                 |                     | <i>Data found in the literature</i>           |                                       |                                               |                                           |                                |                                                |
|------------------------------------|----------------------------------------------------------|----------------------|-----------|---------------------------------|---------------------|-----------------------------------------------|---------------------------------------|-----------------------------------------------|-------------------------------------------|--------------------------------|------------------------------------------------|
| <i>Sample</i>                      | <i>Iron source<sup>b</sup>;<br/>Additive<sup>c</sup></i> | <i>Method</i>        | <i>pH</i> | <i>T of<br/>ageing<br/>(°C)</i> | <i>Time<br/>(h)</i> | <i>BET surface<br/>area (m<sup>2</sup>/g)</i> | <i>Average<br/>pore size<br/>(nm)</i> | <i>Pore<br/>Volume<br/>(cm<sup>3</sup>/g)</i> | <i>Particle Size:<br/>TEM (nm)</i>        | <i>Morphology</i>              | <i>Reference</i>                               |
| Goethite                           | Fe(III) salt;<br>No additive                             | Sol-gel <sup>d</sup> | 11-12     | 25-120                          | 48-288              | n.a.                                          | n.a.                                  | n.a.                                          | Length: 202 to<br>282; Width:<br>16 to 86 | Rod or Lath-<br>like particles | <sup>28</sup> Thies-<br>Weesie et al.,<br>2007 |

|          |                                 |                                               |      |    |     |      |      |      |                             |           |                               |
|----------|---------------------------------|-----------------------------------------------|------|----|-----|------|------|------|-----------------------------|-----------|-------------------------------|
| Goethite | Fe(III) salt;<br>With additives | Micro-emulsion and precipitation <sup>e</sup> | n.a. | 90 | 2-6 | n.a. | n.a. | n.a. | Length: 60 to 150; Width: 7 | Nanotubes | <sup>29</sup> Yu et al., 2007 |
|----------|---------------------------------|-----------------------------------------------|------|----|-----|------|------|------|-----------------------------|-----------|-------------------------------|

<sup>a</sup>Implied batch system. <sup>b</sup>Fe(III) salt: Fe(NO<sub>3</sub>)<sub>3</sub>·9H<sub>2</sub>O or FeCl<sub>3</sub> <sup>c</sup>Additives: hydrazine sulphate, oleic acid, and xylene. <sup>d</sup>Alkaline source: NaOH or NH<sub>4</sub>OH <sup>e</sup>Precipitating agent: CH<sub>3</sub>CH<sub>2</sub>OH.

n.a.: Not reported.

Table S5. Comparison of textural characterization and microstructure of the solids obtained in this study with those found in the literature (continuation).

| <i>Synthetic route<sup>a</sup></i> |                                                      |                      |           |                         |                 | <i>Data found in the literature</i>       |                               |                                       |                                |                   |                                     |
|------------------------------------|------------------------------------------------------|----------------------|-----------|-------------------------|-----------------|-------------------------------------------|-------------------------------|---------------------------------------|--------------------------------|-------------------|-------------------------------------|
| <i>Sample</i>                      | <i>Iron source<sup>b</sup>; Additive<sup>c</sup></i> | <i>Method</i>        | <i>pH</i> | <i>T of ageing (°C)</i> | <i>Time (h)</i> | <i>BET surface area (m<sup>2</sup>/g)</i> | <i>Average pore size (nm)</i> | <i>Pore Volume (cm<sup>3</sup>/g)</i> | <i>Particle Size: TEM (nm)</i> | <i>Morphology</i> | <i>Reference</i>                    |
| Goethite                           | Fe(III) salt;<br>With additive                       | Sol-gel <sup>d</sup> | 12        | 90                      | 72              | n.a.                                      | n.a.                          | n.a.                                  | Length:90-152;<br>Width:10-14  | Nanorods          | <sup>30</sup> Lee Penn et al., 2006 |

|          |                              |                            |       |    |        |         |         |           |                         |                                           |                                         |
|----------|------------------------------|----------------------------|-------|----|--------|---------|---------|-----------|-------------------------|-------------------------------------------|-----------------------------------------|
| Goethite | Fe(III) salt;<br>No additive | Precipitation <sup>e</sup> | 1.7-8 | 25 | > 0.25 | 280-316 | 1.7-8.8 | 0.22-0.47 | Largest dimension: 2-10 | Spongy mass.<br>Not well defined nanorods | <sup>31</sup> Bakoyannakis et al., 2003 |
|----------|------------------------------|----------------------------|-------|----|--------|---------|---------|-----------|-------------------------|-------------------------------------------|-----------------------------------------|

<sup>a</sup>Dialysis (semicontinuous reactor). <sup>b</sup>Fe(III) salt: Fe(NO<sub>3</sub>)<sub>3</sub>·9H<sub>2</sub>O, FeCl<sub>3</sub>·6H<sub>2</sub>O or Fe<sub>2</sub>(SO<sub>4</sub>)<sub>3</sub>·xH<sub>2</sub>O. <sup>c</sup>Additive: NaHCO<sub>3</sub>. <sup>d</sup>Alkaline source (OH): NaOH. <sup>e</sup>Precipitating agent: (NH<sub>4</sub>)<sub>2</sub>CO<sub>3</sub> or NH<sub>2</sub>CO<sub>2</sub>NH<sub>4</sub>.  
n.a. Not reported.

Table S5. Comparison of textural characterization and microstructure of the solids obtained in this study with those found in the literature (continuation).

| <i>Synthetic route<sup>a</sup></i> |                                          |                           |           |                         |                 | <i>Data found in the literature</i>       |                               |                                       |                                |                   |                  |
|------------------------------------|------------------------------------------|---------------------------|-----------|-------------------------|-----------------|-------------------------------------------|-------------------------------|---------------------------------------|--------------------------------|-------------------|------------------|
| <i>Sample</i>                      | <i>Iron source<sup>b</sup>; Additive</i> | <i>Method<sup>c</sup></i> | <i>pH</i> | <i>T of ageing (°C)</i> | <i>Time (h)</i> | <i>BET surface area (m<sup>2</sup>/g)</i> | <i>Average pore size (nm)</i> | <i>Pore Volume (cm<sup>3</sup>/g)</i> | <i>Particle Size: TEM (nm)</i> | <i>Morphology</i> | <i>Reference</i> |

|          |                                    |         |          |        |        |             |                     |          |                                                 |                               |                                         |
|----------|------------------------------------|---------|----------|--------|--------|-------------|---------------------|----------|-------------------------------------------------|-------------------------------|-----------------------------------------|
| Goethite | Fe(III)<br>salt;<br>No<br>additive | Sol-gel | n.a.     | 80     | 48     | 40.20-47.05 | n.a.                | n.a.     | n.a.                                            | n.a.                          | <sup>32</sup> Kosmulski<br>et al., 2003 |
| Goethite | Fe(III)<br>salt;<br>No<br>additive | Sol-gel | G1: 3-13 | G1: 95 | G1:168 | G1: 51.3    | G1: 28.36-<br>32.20 | G1:0.404 | G1: Length:<br>400 ± 50;<br>Width :15 ± 5       | G1: Highly<br>acicular        | This study                              |
|          |                                    |         | G2: 3-13 | G2: 95 | G2:168 | G2: 53.6    | G2: 22.07-<br>23.95 | G2:0.322 | G2: Length:<br>950 ± 100;<br>Width :140 ±<br>20 | G2:<br>Moderately<br>acicular |                                         |

<sup>a</sup>Implied batch system. <sup>b</sup>Fe(III) salt: Fe(NO<sub>3</sub>)<sub>3</sub> or FeCl<sub>3</sub>·6H<sub>2</sub>O <sup>c</sup>Precipitating agent: KOH or NaOH  
n.a.: Not reported.

Table S5. Comparison of textural characterization and microstructure of the solids obtained in this study with those found in the literature (continuation).

| <i>Sample</i>                    | <i>Synthetic route<sup>a</sup></i>           |                           |              |                                 |                     | <i>Data found in the literature</i>           |                                       |                                               |                                                                         |                                                            |                                                    |
|----------------------------------|----------------------------------------------|---------------------------|--------------|---------------------------------|---------------------|-----------------------------------------------|---------------------------------------|-----------------------------------------------|-------------------------------------------------------------------------|------------------------------------------------------------|----------------------------------------------------|
|                                  | <i>Iron source<sup>b</sup>;<br/>Additive</i> | <i>Method<sup>c</sup></i> | <i>pH</i>    | <i>T of<br/>ageing<br/>(°C)</i> | <i>Time<br/>(h)</i> | <i>BET surface<br/>area (m<sup>2</sup>/g)</i> | <i>Average<br/>pore size<br/>(nm)</i> | <i>Pore<br/>Volume<br/>(cm<sup>3</sup>/g)</i> | <i>Particle Size:<br/>FESEM<sup>e</sup> or TEM<sup>f</sup><br/>(nm)</i> | <i>Morphology</i>                                          | <i>Reference</i>                                   |
| Mixture<br>Goethite-<br>Hematite | Fe(III) salt;<br>No additive                 | Sol-gel                   | 2.5-<br>13.5 | 70                              | 24                  | 31.20                                         | n.a.                                  | n.a.                                          | Length <sup>e</sup> : 750±100;<br>Width <sup>e</sup> : 60±20            | Highly<br>acicular<br>goethite; no<br>data for<br>hematite | <sup>10</sup> Montes-<br>Hernández et<br>al., 2011 |
| Mixture<br>Goethite-<br>Hematite | Fe(III) salt;<br>No additive                 | Sol-gel                   | 3-13         | 95                              | 168                 | 13.2                                          | 27.74-31.56                           | 0.102                                         | Length <sup>f</sup> : 880±100;<br>Width <sup>f</sup> : 145±50           | Acicular<br>(goethite);<br>Pseudocubic<br>(hematite)       | This study<br>(GH)                                 |

<sup>a</sup>Implying batch system. <sup>b</sup>Fe(III) salt: Fe(NO<sub>3</sub>)<sub>3</sub>·9H<sub>2</sub>O or FeCl<sub>3</sub>·6H<sub>2</sub>O. <sup>c</sup>Alkaline source: NaOH or Ca(OH)<sub>2</sub>.  
n.a.: Not reported.

## 7. References

1. M. Tadic, N. Citakovic, M. Panjan, B. Stanojevic, D. Markovic, Đ. Jovanovic and V. Spasojevic, *J. Alloy. Compd.*, 2012, **543**, 118-124.
2. W. Qin, C. Yang, R. Yi and G. Gao, *J. Nanomater.*, 2011, **2011**, 1-5.
3. W. Hamd, S. Cobo, J. Fize, G. Baldinozzi, W. Schwartz, M. Reymermier, A. Pereira, M. Fontecave, V. Artero, C. Laberty-Robert and C. Sanchez, *Phys. Chem. Chem. Phys.*, 2012, **14**, 13224-13232.
4. I. V. Chernyshova, S. Ponnurangam and P. Somasundaran, *Phys. Chem. Chem. Phys.*, 2010, **12**, 14045-14056.
5. F. M. Michel, L. Ehm, S. M. Antao, P. L. Lee, P. J. Chupas, G. Liu, D. R. Strongin, M. A. A. Schoonen, B. L. Phillips and J. B. Parise, *Science*, 2007, **316**, 1726-1729.
6. H. Tüysüz, E. L. Salabaş, C. Weidenthaler and F. Schüth, *J. Am. Chem. Soc.*, 2007, **130**, 280-287.
7. M. Fleischer, G. Y. Chao and A. Kato, *Am. Mineral.*, 1975, **60**, 485-489.
8. M. Ristić, I. Opačak, J. Štajdohar and S. Musić, *J. Mol. Struct.*, 2015, **1090**, 129-137.
9. C. Wei, P. Qiao, Z. Nan, *Mater. Sci. Eng: C*, 2012, **32**, 1524-1530.
10. G. Montes-Hernandez, P. Beck, F. Renard, E. Quirico, B. Lanson, R. Chiriac and N. Findling, *Cryst. Growth Des.*, 2011, **11**, 2264-2272.
11. M. Ristić, E. De Grave, S. Musić, S. Popović and Z. Orehovec, *J. Mol. Struct.*, 2007, **834–836**, 454-460.
12. E. Murad, *Phys. Chem. Miner.*, 1996, **23**, 248-262.
13. N. Pariona, K. I. Camacho-Aguilar, R. Ramos-González, A. I. Martinez, M. Herrera-Trejo and E. Baggio-Saitovitch, *J. Magn. Magn. Mater.*, 2016, **406**, 221-227.

14. M. Mashlan, R. Zboril, L. Machala, M. Vujtek, J. Walla and K. Nomura, *J. Metastab. Nanocryst.*, 2004, **20-21**, 641-647.
15. R. Zboril, M. Mashlan and D. Petridis, *Chem. Mater.*, 2002, **14**, 969-982.
16. S. Krehula and S. Musić, *J. Cryst. Growth*, 2008, **310**, 513-520.
17. C. Su and D. L. Suarez, *Clay. Clay. Miner.*, 1997, **45**, 814-825.
18. A. M. Jubb and H. C. Allen, *ACS Appl. Mater. Inter.*, 2010, **2**, 2804-2812.
19. M. Gotić and S. Musić, *J. Mol. Struct.*, 2007, **834-836**, 445-453.
20. H. D. Ruan, R. L. Frost and J. T. Kloprogge, *Spectrochim. Acta A*, 2001, **57**, 2575-2586.
21. B. Paul, B. Bhuyan, D. D. Purkayastha and S. S. Dhar, *Catal. Commun.*, 2015, **69**, 48-54.
22. S. Sivakumar, D. Anusuya, C. P. Khatiwada, J. Sivasubramanian, A. Venkatesan and P. Soundhirarajan, *Spectrochim. Acta Part A*, 2014, **128**, 69-75.
23. K. Supattarasakda, K. Petcharoen, T. Permpool, A. Sirivat and W. Lerdwijitjarud, *Powder Technol.*, 2013, **249**, 353-359.
24. H. Liu, Y. Wei, P. Li, Y. Zhang and Y. Sun, *Mater. Chem. Phys.*, 2007, **102**, 1-6.
25. Z. Xu, J. Yu and W. Xiao, *Chem – Eur. J.*, 2013, **19**, 9592-9598.
26. Z. Yan, Z. Xu, J. Yu and M. Jaroniec, *Environ. Sci. Technol.*, 2015, **49**, 6637-6644.
27. M. Mohapatra, K. Rout, S. K. Gupta, P. Singh, S. Anand and B. K. Mishra, *J. Nanopart. Res.*, 2009, **12**, 681-686.
28. D. M. E. Thies-Weesie, J. P. de Hoog, M. H. Hernandez Mendiola, A. V. Petukhov and G. J. Vroege, *Chem. Mater.*, 2007, **19**, 5538-5546.
29. T. Yu, J. Park, J. Moon, K. An, Y. Piao and T. Hyeon, *J. Am. Chem. Soc.*, 2007, **129**, 14558-14559.
30. R. Lee Penn, J. J. Erbs and D. M. Gulliver, *J. Cryst. Growth*, 2006, **293**, 1-4.



31. D. N. Bakoyannakis, E. A. Deliyanni, A. I. Zouboulis, K. A. Matis, L. Nalbandian and T. Kehagias, *Micropor. and Mesopor. Mat.*, 2003, **59**, 35-42.
32. M. Kosmulski, E. Maczka, E. Jartych and J. B. Rosenholm, *Adv. Colloid Interfac.*, 2003, **103**, 57-76.
